# Supplementary material for: The inflammatory cytokine profiles and ocular biometric characteristics of primary angle-closure glaucoma
Source: PubMed Central journal article supplement — J Int Med Res. 2023 Jan 11;51(1):03000605221147434. doi: 10.1177/03000605221147434 (PMC9841865; doi:10.1177/03000605221147434), 2023-01-11
Supplement: sj-pdf-1-imr-10.1177_03000605221147434.pdf [file sj-pdf-1-imr-10.1177_03000605221147434.pdf]

**Table S1.** Sample size calculation results

| Variable/Disease                                        | Power | Group   | Mean/Median | Size | Alpha | Method                               |
|---------------------------------------------------------|-------|---------|-------------|------|-------|--------------------------------------|
| <b>Power analyses for meaningful results of Table 1</b> |       |         |             |      |       |                                      |
| Corneal diameter                                        | 0.90  | Control | 11.32       | 37   | 0.05  | one-way analysis of variance         |
|                                                         |       | APACG   | 10.99       | 34   | 0.05  |                                      |
|                                                         |       | CPACG   | 11.05       | 28   | 0.05  |                                      |
| Subfoveal choroidal thickness                           | 0.85  | Control | 151.79      | 37   | 0.05  | one-way analysis of variance         |
|                                                         |       | APACG   | 176.96      | 34   | 0.05  |                                      |
|                                                         |       | CPACG   | 167.68      | 28   | 0.05  |                                      |
| Lens thickness                                          | 1.00  | Control | 4.32        | 37   | 0.05  | one-way analysis of variance         |
|                                                         |       | APACG   | 4.93        | 34   | 0.05  |                                      |
|                                                         |       | CPACG   | 4.80        | 28   | 0.05  |                                      |
| Mean radius of corneal                                  | 0.61  | Control | 44.27       | 37   | 0.05  | one-way analysis of variance         |
|                                                         |       | APACG   | 45.50       | 34   | 0.05  |                                      |
|                                                         |       | CPACG   | 44.76       | 28   | 0.05  |                                      |
| Anterior chamber depth                                  | 1.00  | Control | 2.46        | 37   | 0.05  | one-way analysis of variance         |
|                                                         |       | APACG   | 1.64        | 34   | 0.05  |                                      |
|                                                         |       | CPACG   | 1.93        | 28   | 0.05  |                                      |
| Anterior chamber volume                                 | 1.00  | Control | 114.00      | 37   | 0.05  | one-way analysis of variance         |
|                                                         |       | APACG   | 58.50       | 34   | 0.05  |                                      |
|                                                         |       | CPACG   | 74.00       | 28   | 0.05  |                                      |
| Axial length                                            | 1.00  | Control | 23.41       | 37   | 0.05  | one-way analysis of variance         |
|                                                         |       | APACG   | 22.30       | 34   | 0.05  |                                      |
|                                                         |       | CPACG   | 22.63       | 28   | 0.05  |                                      |
| <b>Power analyses for meaningful results of Table 2</b> |       |         |             |      |       |                                      |
| Anterior chamber depth                                  | 1.00  | Normal  | 2.46        | 37   | 0.05  | Wilcoxon Mann-Whitney U-Test         |
|                                                         |       | PACG    | 1.70        | 62   | 0.05  |                                      |
| Anterior chamber volume                                 | 1.00  | Normal  | 114.00      | 37   | 0.05  | Wilcoxon Mann-Whitney U-Test         |
|                                                         |       | PACG    | 58.50       | 62   | 0.05  |                                      |
| Axial length                                            | 1.00  | Normal  | 23.41       | 37   | 0.05  | Wilcoxon Mann-Whitney U-Test         |
|                                                         |       | PACG    | 22.32       | 62   | 0.05  |                                      |
| IL-6                                                    | 0.86  | Normal  | 2.16        | 32   | 0.05  | Wilcoxon Mann-Whitney U-Test         |
|                                                         |       | PACG    | 1.50        | 31   | 0.05  |                                      |
| NLR                                                     | 0.75  | Normal  | 1.56        | 32   | 0.05  | Wilcoxon Mann-Whitney U-Test         |
|                                                         |       | PACG    | 2.23        | 31   | 0.05  |                                      |
| Mean radius of corneal                                  | 0.65  | Normal  | 44.27       | 37   | 0.05  | T test                               |
|                                                         |       | PACG    | 45.16       | 62   | 0.05  |                                      |
| Lens thickness                                          | 0.99  | Normal  | 4.32        | 37   | 0.05  | T test                               |
|                                                         |       | PACG    | 4.87        | 62   | 0.05  |                                      |
| Corneal diameter                                        | 0.94  | Normal  | 11.32       | 37   | 0.05  | T test                               |
|                                                         |       | PACG    | 11.02       | 62   | 0.05  |                                      |
| Subfoveal choroidal thickness                           | 0.92  | Normal  | 151.11      | 37   | 0.05  | T test                               |
|                                                         |       | PACG    | 173.11      | 62   | 0.05  |                                      |
| <b>Power analyses for meaningful results of Table 3</b> |       |         |             |      |       |                                      |
| APACG                                                   | 0.99  | IL-6    | r= -0.577   | 34   | 0.05  | Pearson correlation coefficient test |
|                                                         |       | CT      |             | 15   | 0.05  |                                      |
| CPACG                                                   | 0.99  | IL-6    | r= -0.603   | 20   | 0.05  | Pearson correlation coefficient test |
|                                                         |       | NLR     |             | 21   | 0.05  |                                      |
